# Supplementary material for: A self-immolative dendritic glucuronide prodrug of doxorubicin
Source: Royal Society of Chemistry journal article supplement (doi:10.1039/c1md00193k), 2011-10-19
Supplement: c1md00193k.pdf [file c1md00193k.pdf]

## **Supporting Information**

# **A Self-Immolative Dendritic Glucuronide Prodrug of Doxorubicin**

**Marion Grinda,<sup>a</sup> Jonathan Clarhaut,<sup>b</sup> Brigitte Renoux,<sup>a</sup> Isabelle Tranoy-Opalinski,<sup>a</sup> and Sébastien Papot<sup>\*a</sup>**

<sup>a</sup> Université de Poitiers, UMR-CNRS 6514, Laboratoire de Synthèse et Réactivité des Substances Naturelles 4 rue Michel Brunet, BP 633, 86022 Poitiers, France.

<sup>b</sup> Université de Poitiers, UMR-CNRS 6187, Institut de Physiologie et Biologie Cellulaires, Pôle Biologie Santé, 1 rue Georges Bonnet, BP 633, 86022 Poitiers, France and INSERN CIC 0802, 2 rue de la Milétrie, CHU de Poitiers, France.

\*e-mail: sebastien.papot@univ-poitiers.fr

## **Table of Contents**

|                                                                                   |            |
|-----------------------------------------------------------------------------------|------------|
| <b>I. Chemistry Section</b>                                                       | <b>S2</b>  |
| General experimental section                                                      | S2         |
| Structure of HMR 1826 and $\beta$ -glucuronidase-catalysed drug release mechanism | S3         |
| Experimental procedures                                                           | S3         |
| Stability                                                                         | S10        |
| Enzymatic cleavage                                                                | S10        |
| <sup>1</sup> H NMR and <sup>13</sup> C NMR plots                                  | S11        |
| <b>II. Biological Section</b>                                                     | <b>S17</b> |
| Cell culture                                                                      | S17        |
| Cell viability                                                                    | S17        |
| <b>III. References</b>                                                            | <b>S18</b> |

## I. Chemistry Section

### General experimental section

All reactions were performed under an atmosphere of N<sub>2</sub>. Unless otherwise stated, solvents used were of HPLC quality. Chemicals were of analytical grade from commercial sources and were used without further purification. The reaction progress was monitored on precoated silica gel TLC plates MACHEREY-NAGEL ALUGRAM® SIL G/UV<sub>254</sub>. (0.2 mm silica gel 60). Spots were visualized under 254 nm UV light and/or by dipping the TLC plate into a solution of 3 g of phosphomolibdic acid in 100 mL of ethanol followed by heating with a hot gun. Flash column chromatography was performed using MACHEREY-NAGEL silica gel 60 (15-40 µm) as the stationary phase. <sup>1</sup>H and <sup>13</sup>C NMR spectra were recorded either on a Bruker Avance DPX 300 instrument or on a Bruker 400 Avance III instrument, equipped with an ultra shielded magnet and a BBFO 5 mm broadband probe. Chemical shifts (δ) are reported in parts per million from high to low field and referenced to residual solvent. Coupling constant (*J*) are reported in hertz (Hz). Standard abbreviations indicating multiplicity are used as follows: br = broad, s = singlet, d = doublet, t = triplet, m = multiplet. Melting points were measured on a Büchi Melting Point B-545 instrument and are uncorrected. High resolution ESI mass spectrometry was carried out by the CRMPO (Centre Régional de Mesures Physiques de l'Ouest), at the University of Rennes 1. Low resolution ESI mass spectrometry was carried with a Waters instrument 3100 Mass Detector. Analytical RP-HPLC was carried out on a Dionex Ultimate 3000 system equipped with a UV/Visible variable wavelength detector and with a reverse-phase column chromatography Acclaim<sup>(R)</sup> (120, C18, 250x4.6 mm, 5 µm, 120 Å) at 30°C and 1mL.min<sup>-1</sup>. Gradient eluent was composed of A (0.2% TFA in water) and B (CH<sub>3</sub>CN). Preparative reverse-phase HPLC for **1** was performed with a VWR LaPrep system. Solvent flow of 30 mL.min<sup>-1</sup> was applied to a semi-preparative column Merck Hibar® 125-25 (Purospher®STAR RP-18e 5 µm). Gradient eluent was composed of A (0.2% TFA in water) and B (CH<sub>3</sub>CN). Method 1: linear gradient beginning with A/B = 70/30 v/v during 5 min., from A/B = 70/30 to A/B = 0/100 v/v within 15 min. and A/B = 0/100 during 5 min. Method 2: linear gradient beginning with A/B = 70/30 v/v during 5 min. and then from A/B = 70/30 to A/B = 30/70 v/v within 15 min. All chromatograms were recorded at 254 nm.

## Structure of HMR 1826 and $\beta$ -glucuronidase-catalysed drug release mechanism

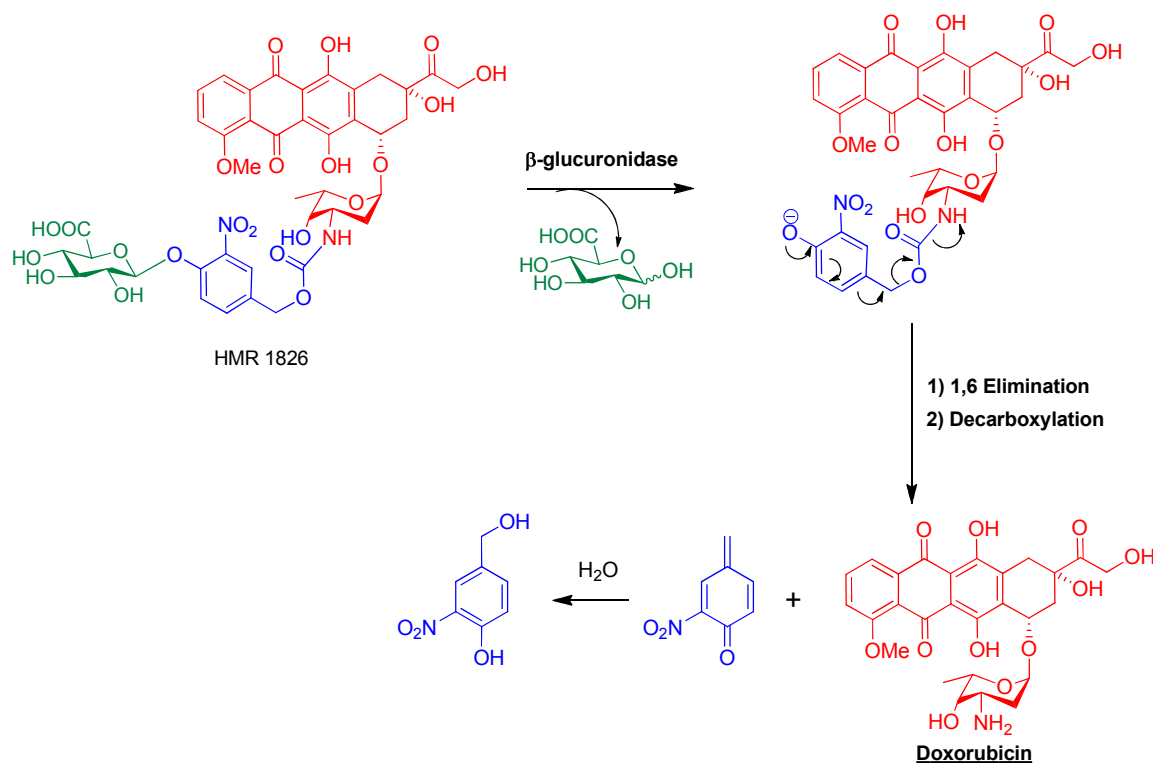

## Experimental procedures

### Preparation of compound 6

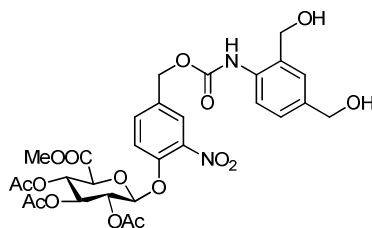

To a stirred solution of **4**<sup>[1]</sup> (549 mg, 0.85 mmol) in DMF (8 mL) was added **5**<sup>[2]</sup> (259 mg, 1.69 mmol) and HOBt (114 mg, 0.85 mmol). The mixture was stirred overnight at 50 °C. The solution was concentrated under reduced pressure and the crude material was purified by column chromatography over silica gel (petroleum ether/ethyl acetate: 60 to 100% ethyl acetate) to give **6** (393 mg, 0.59 mmol, 70%) as a colorless solid.

<sup>1</sup>H NMR (300 MHz, CDCl<sub>3</sub>):  $\delta$  1.97-2.00 (3x s, 9H), 3.63 (s, 3H), 3.86 (br s, 2H), 4.20 (d, 1H,  $J$  = 9.0 Hz), 4.36 (s, 2H), 4.41 (s, 2H), 5.00 (s, 2H) 5.15-5.26 (m, 4H), 6.93(s, 1H), 7.02 (d, 1H,  $J$  = 8.4 Hz), 7.24 (d, 1H,  $J$  = 8.5 Hz), 7.45 (d, 1H,  $J$  = 8.5 Hz), 7.58 (d, 1H,  $J$  = 8.5 Hz),

7.71 (s, 1H), 8.13 (br s, 1H);  $^{13}\text{C}$  NMR (75 MHz,  $\text{CDCl}_3$ ):  $\delta$  20.5, 20.5, 20.6, 53.1, 63.3, 64.1, 65.0, 68.7, 70.1, 71.1, 72.2, 99.4, 119.4, 121.1, 124.8, 127.3, 127.3, 130.0, 132.4, 133.8, 136.0, 136.4, 140.7, 148.7, 153.7, 166.9, 169.5, 169.6, 170.1; HRESI-MS:  $m/z$  687.1644 (calcd. for  $\text{C}_{29}\text{H}_{32}\text{N}_2\text{O}_{16}\text{Na}$  687.1644  $[\text{M}+\text{Na}]^+$ ); m.p. dec  $71^\circ\text{C}$ .

### Preparation of compound 7

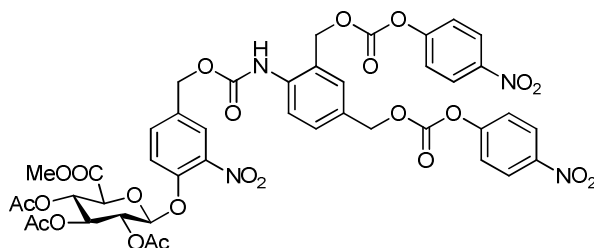

Anhydrous pyridine (304  $\mu\text{L}$ , 3.76 mmol) was added dropwise to a cooled solution ( $0^\circ\text{C}$ ) of *p*-nitrophenyl chloroformate (759 mg, 3.76 mmol) in  $\text{CH}_2\text{Cl}_2$  (8 mL). The mixture was stirred for 20 minutes at  $0^\circ\text{C}$ . A solution of **6** (833 mg, 1.25 mmol) in  $\text{CH}_2\text{Cl}_2$  (11 mL) was added and the mixture was stirred for 1 hour at room temperature. The reaction was quenched with a saturated solution of NaCl and extracted with  $\text{CH}_2\text{Cl}_2$  (3x). The combined organic layers were dried over  $\text{MgSO}_4$ , filtered and concentrated under reduced pressure. The resulting crude material was purified by column chromatography over silica gel (petroleum ether/ethyl acetate: 40 to 75% ethyl acetate) to give **7** (1.22 mg, 1.23 mmol, 98%) as a colorless solid.

$^1\text{H}$  NMR (300 MHz,  $\text{CDCl}_3$ ):  $\delta$  2.07-2.12 (3x s, 9H), 3.74 (s, 3H), 4.23-4.26 (m, 1H), 5.20-5.36 (m, 10H), 7.33-7.41 (m, 5H), 7.50-7.60 (m, 3H), 7.68 (br s, 1H), 7.86-7.91 (m, 2H), 8.24-8.27 (m, 4H);  $^{13}\text{C}$  NMR (75 MHz,  $\text{CDCl}_3$ ):  $\delta$  20.5, 20.5, 20.6, 53.1, 65.4, 67.6, 68.6, 70.0, 70.1, 70.9, 72.5, 99.5, 115.6, 119.8, 121.7, 121.8 (x2), 123.3, 124.9, 125.2, 125.3 (x2), 125.4, 126.1, 130.8, 131.1, 131.9, 132.2, 133.7, 137.3, 141.1, 145.4, 145.6, 148.9, 152.4, 152.9, 153.4, 155.1, 155.4, 166.8, 169.3, 169.4, 170.0; HRESI-MS:  $m/z$  1017.1766 (calcd. for  $\text{C}_{43}\text{H}_{38}\text{N}_4\text{O}_{24}\text{Na}$  1017.17682  $[\text{M}+\text{Na}]^+$ ); m.p. dec.  $78^\circ\text{C}$ .

### Preparation of compound 8

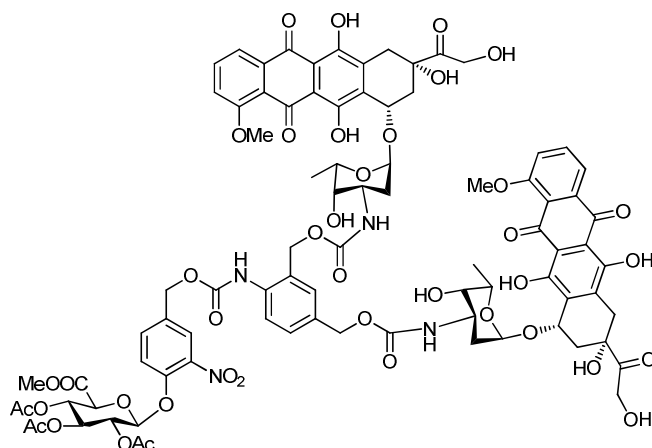

To a solution of doxorubicin hydrochloride (175 mg, 0.30 mmol) in DMF (1.5 mL) was added triethylamine (42  $\mu$ L, 0.30 mmol). The mixture was stirred for 30 minutes at room temperature before adding HOBt (41 mg, 0.30 mmol) and a solution of **7** (150 mg, 0.15 mmol) in DMF (1 mL) and stirring was continued for 3 hours. The reaction was quenched with a saturated solution of NaCl and extracted with  $\text{CH}_2\text{Cl}_2$  (4x) and ethyl acetate (1x). The combined organic layers were dried over  $\text{MgSO}_4$ , filtered and concentrated under reduced pressure (CAUTION: Do not heat the water bath). The resulting crude material was purified by column chromatography over silica gel ( $\text{CH}_2\text{Cl}_2/\text{MeOH}$ : 0 to 7% MeOH) to give **8** (308 mg, 0.17 mmol, 57%) as red powder.

$^1\text{H}$  NMR (400 MHz,  $\text{CDCl}_3$ ):  $\delta$  1.24–1.29 (m, 6H), 1.82 (m, 6H), 2.05–2.28 (m, 14H), 2.81–2.88 (m, 2H), 3.10–3.20 (m, 4H), 3.62–3.79 (m, 6H), 4.01–4.25 (m, 10H), 4.57–5.42 (m, 21H), 7.100 (m, 2H), 7.25–7.34 (m, 2H, masked by  $\text{CHCl}_3$  residual signal), 7.42–7.53 (m, 3H), 7.72–7.90 (m, 6H), 13.07 (br s, 2H), 13.85 (br s, 2H);  $^{13}\text{C}$  NMR (100 MHz,  $\text{CDCl}_3$ ):  $\delta$  16.8 (x2), 20.5, 20.6, 21.0, 29.7 (x2), 30.0 (x2), 33.7 (x2), 35.6 (x2), 47.1 (x2), 47.2 (x2), 53.1, 56.5 (x2), 60.4 (x2), 65.4 (x2), 67.4 (x2), 68.7, 69.4, 70.2, 71.1, 72.4, 99.6, 100.9 (x2), 111.2 (x2), 111.4 (x2), 114.4, 118.5, 119.8, 124.8 (x2), 132.6 (x2), 133.4 (x2), 133.6 (x2), 134.1 (x2), 134.2 (x2), 135.1 (x2), 135.8, 135.9, 140.9, 144.1 (x2), 148.6 (x2), 153.6 (x2), 155.4(x2), 155.6 (x2), 155.9, 156.1 (x2), 160.9, 166.7, 167.7, 169.3, 169.4, 170.0, 171.2, 186.3 (x2), 186.7 (x2), 213.7 (x2); HRESI, MS:  $m/z$  1825.4709 (calcd. for  $\text{C}_{85}\text{H}_{86}\text{N}_4\text{O}_{40}\text{Na}$  1825.47105  $[\text{M}+\text{Na}]^+$ ); m.p. dec. 208°C.

To a solution of **9** (11.9, 27, 29 or 32  $\mu\text{mol}$ ) in water/THF v/v (4, 9, 10 or 11 mL) was added an aqueous solution of NaOH 2N (2 or 3  $\text{equiv.}$ ) at  $-5^{\circ}\text{C}$  or  $-15^{\circ}\text{C}$ . The mixture was stirred for 15, 30 min, 2 or 3 hours. In all cases, the reaction led to a complex mixture (see HPLC analysis).

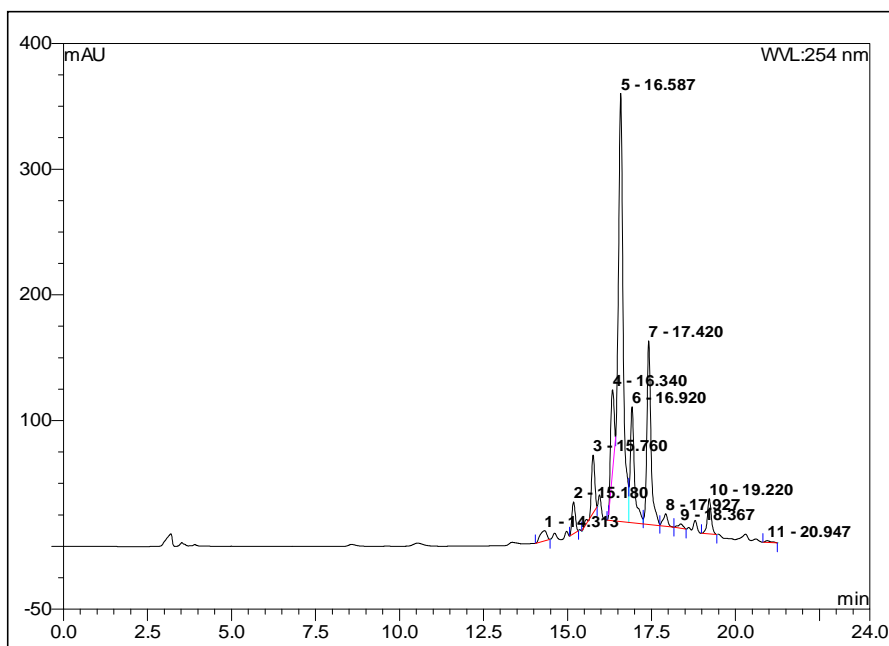

HPLC analysis of the crude mixture of ester **9** hydrolysis conducted in the presence of NaOH.

### Preparation of compound **11**

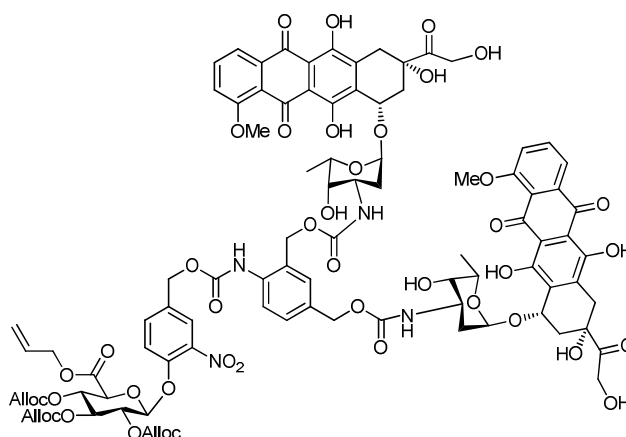

To a solution of doxorubicin hydrochloride (148.2 mg, 0.25 mmol) in DMF (1 mL) was added triethylamine (35.5  $\mu$ L, 0.25 mmol). The mixture was stirred for 30 minutes at room temperature before adding HOBt (34.5 mg, 0.25 mmol) and a solution of **10**<sup>[3]</sup> (145 mg, 0.127 mmol) in DMF (1 mL) and stirring was continued for 3 hours. The reaction was quenched with a saturated solution of NaCl and extracted with CH<sub>2</sub>Cl<sub>2</sub> (4x) and ethyl acetate (1x). The combined organic layers were dried over MgSO<sub>4</sub>, filtered and concentrated under reduced pressure (CAUTION: Do not heat the water bath). The resulting crude material was purified by column chromatography over silica gel (CH<sub>2</sub>Cl<sub>2</sub>/MeOH: 0 to 5% MeOH) to give **11** (144 mg, 0.074 mmol, 58%) as red powder.

$^1\text{H}$  NMR(400 MHz, DMSO-*d*<sub>6</sub>):  $\delta$  1.13 (d, 6H,  $J$  = 6.0 Hz), 1.23 (br s, 2H), 1.51-1.54 (m, 2H), 1.80-1.83 (m, 2H), 1.99-2.22 (m, 4H), 2.73-2.93 (m, 4H), 3.44 (m, 2H) : 3.69 (m, 2H), 3.93 (2x s, 6H), 4.15 (d, 2H,  $J$  = 6.0 Hz), 4.54-4.72 (m, 13H), 4.84-4.94 (m, 8H), 5.00-5.45 (m, 17H), 5.80-5.94 (m, 5H), 6.83 (d, 1H,  $J$  = 7.7 Hz), 6.93 (d, 1H,  $J$  = 7.7 Hz), 7.21 (d, 1H,  $J$  = 8.3 Hz), 7.27 (s, 1H), 7.36 (d, 1H,  $J$  = 8.3 Hz), 7.43 (d, 1H,  $J$  = 8.7 Hz), 7.57 (d, 2H,  $J$  = 7.6 Hz), 7.70 (d, 1H,  $J$  = 8.7 Hz), 7.81-7.87 (m, 4H), 7.93 (s, 1H), 9,11 (br s, 1H), 13.18-13.20 (2x s, 2H), 13.91-13.94 (2x s, 2H);  $^{13}\text{C}$  RMN (100 MHz, DMSO-*d*<sub>6</sub>):  $\delta$  17.0 (x2), 29.7 (x2), 32.1 (x2), 36.6 (x2), 47.1 (x2), 56.5, 63.7 (x2), 64.3 (x2), 66.0 (x2), 66.6 (x2), 67.9 (x2), 68.4 (x2), 68.6, 68.6, 68.8, 70.7, 72.2, 73.7, 74.9, 97.4, 100.3 (x2), 110.6 (x4), 117.4, 118.0, 118.4, 118.6, 118.7 (x2), 118.8 (x2), 119.6 (x2), 119.9, 124.4 (x2), 131.5 (x2), 131.6 (x2), 131.7 (x2), 131.7, 132.4 (x2), 133.9 (x2), 134.5, 135.0, 135.5, 136.0 (x2), 139.9 (x2), 147.6 (x2), 153.1 (x2), 153.2 (x2), 153.6, 153.9 (x2), 153.9, 154.4, 155.2, 155.2, 156.1 (x2), 160.7, 162.3, 165.8 (x2), 186.1 (x2), 186.4 (x2), 213.7 (x2); HRESI-MS:  $m/z$  1977.5180 (calcd. for  $\text{C}_{93}\text{H}_{94}\text{N}_4\text{O}_{43}\text{Na}$  1977.5184  $[\text{M}+\text{Na}]^+$ ); m.p. dec. 146°C.

### Preparation of prodrug **1**

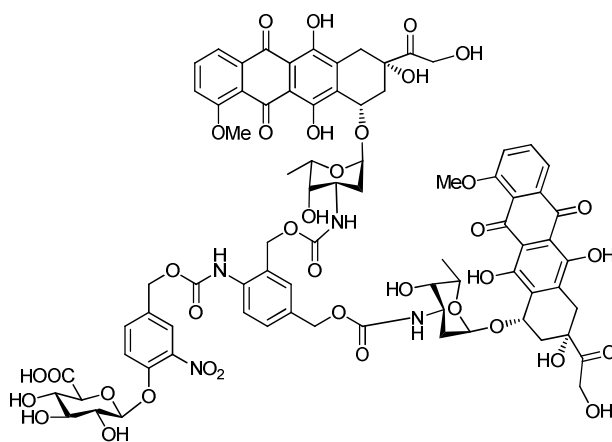

To a solution of compound **11** (23 mg, 12  $\mu\text{mol}$ ) in MeOH/ $\text{CH}_2\text{Cl}_2$  (10/90; 1mL) was added Tetrakis(triphenylphosphine)palladium(0) (3 mg, 2.5  $\mu\text{mol}$ ) and aniline (4.6  $\mu\text{L}$ , 50  $\mu\text{mol}$ ). The mixture was stirred at room temperature and the reaction was monitored by analytical HPLC using Method 1 (retention time for **1**: 16.5 min). Completion of the reaction was accomplished after 24 hours and solvents were removed under reduced pressure (CAUTION: do not heat the water bath). The crude material was triturated with  $\text{CH}_2\text{Cl}_2$  and the resulting solid was collected by filtration and rinsed with  $\text{CH}_2\text{Cl}_2$  to afford **1** as a red powder (16 mg,



10  $\mu$ mol, 84%) with 82% purity. For biological evaluations, **1** was further purified up to 97% purity by preparative reverse-phase HPLC using Method 2.

$^1\text{H}$  NMR(400 MHz, DMSO-*d*<sub>6</sub>):  $\delta$  1.11 (d, 6H,  $J$  = 6.0 Hz), 1.51-1.53 (m, 2H), 1.83 (m, 2H), 2.09-2.22 (m, 4H), 2.88-3.01 (m, 5H), 3.27-3.44 (m, 10H, masked by HOD residual signal), 3.65-3.71 (m, 3H), 3.93-3.98 (m, 6H), 4.15 (d, 2H,  $J$  = 6.0 Hz), 4.58 (s, 3H), 4.73-5.22 (m, 12H), 5.37 (br s, 1H), 5.46 (br s, 1H), 6.86 (d, 1H,  $J$  = 8.0 Hz), 6.94 (d, 1H,  $J$  = 8.0 Hz), 7.00-7.94 (m, 14H), 9.10 (br s, 1H), 13.96 (s, 2H), 14.03 (s, 2H); HRESI-MS:  $m/z$  1661.4264 (calcd. for  $\text{C}_{78}\text{H}_{77}\text{N}_4\text{O}_{37}$  1661.42722 [M-H]<sup>-</sup>). m.p. dec. 142°C.

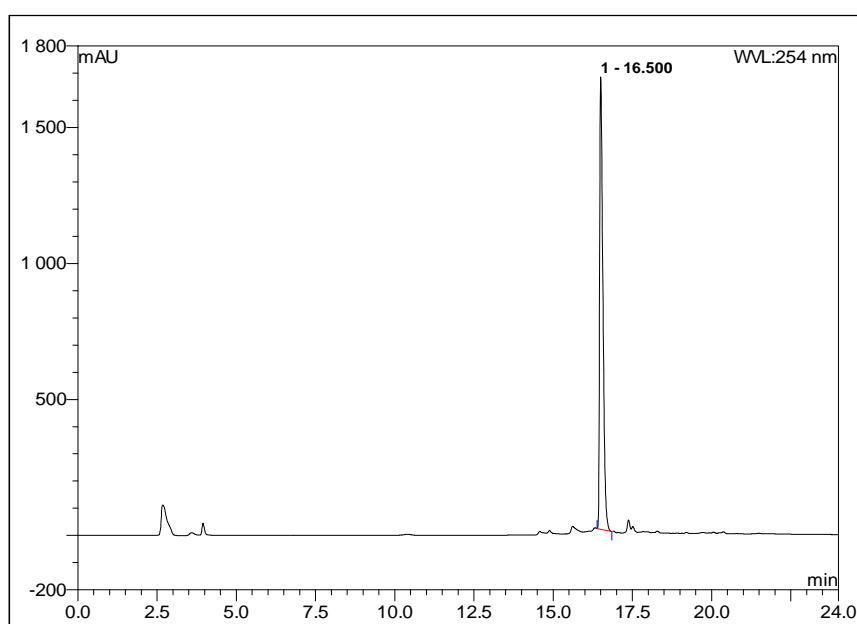

HPLC analysis of prodrug **1** after purification by preparative reverse-phase HPLC

## Stability

Compound **1** (0.1 mg, 0.060  $\mu$ mol) was incubated at 37°C in 20 mM phosphate buffer at pH 7.0 (1 mL). Stability in phosphate buffer was monitored by analytical HPLC using Method 1. HPLC analysis showed no detectable degradation of compound **1** during 10 days under these conditions.

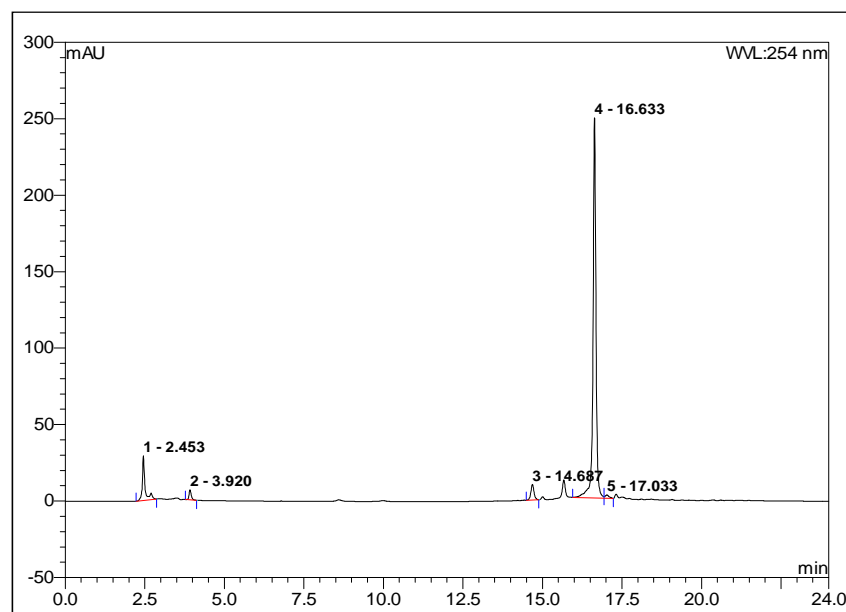

HPLC analysis of compound **1** after 10 days at 37°C in 20 mM phosphate buffer at pH 7.0.

## Enzymatic hydrolysis

Enzymatic hydrolysis was carried out with commercial  $\beta$ -glucuronidase from *Escherichia coli* (aqueous glycerol solution, 20,000,000-60,000,000 units/g protein, pH 6.8 (biuret)). Compound **1** (0.1 mg, 0.060  $\mu$ mol) was incubated with the enzyme (133 U) at 37°C in a solution of phosphate buffer (20 mM, pH 7)/DMSO 99/1 (1 mL). Hydrolysis was monitored by analytical HPLC using Method 1.

# <sup>1</sup>H NMR and <sup>13</sup>C NMR spectra

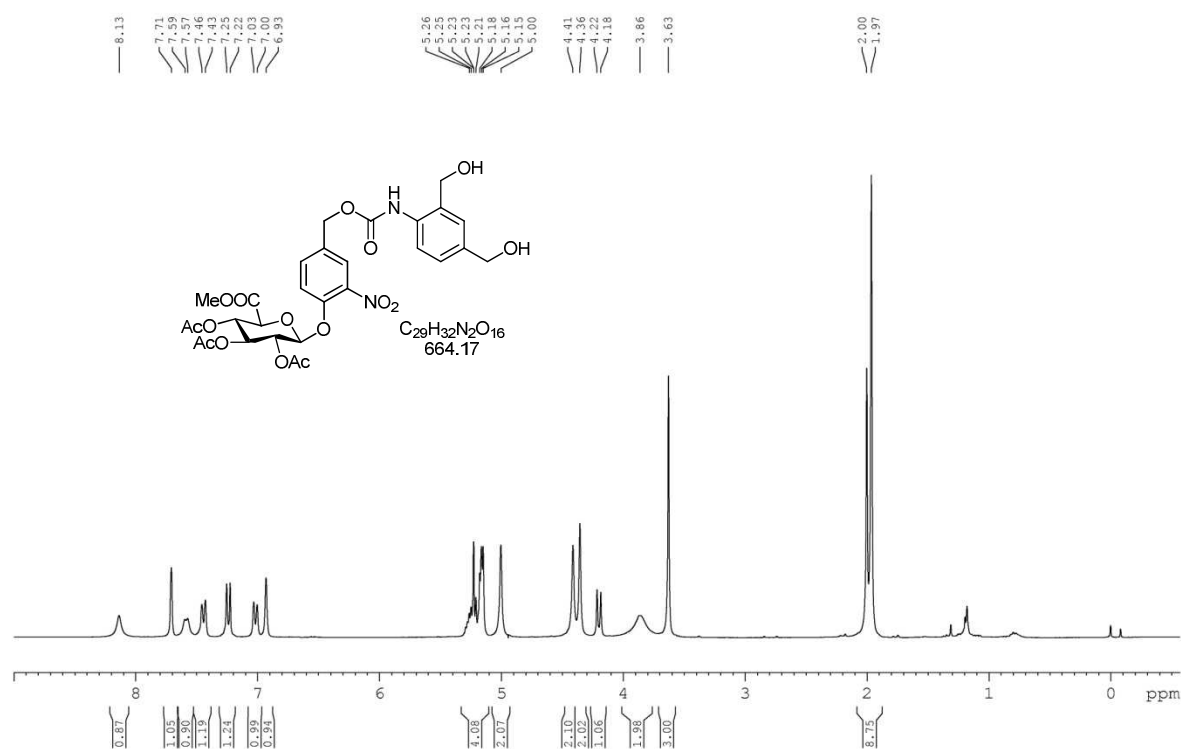

<sup>1</sup>H NMR spectrum of **6**,  
300 MHz, 298 K, CDCl<sub>3</sub>.

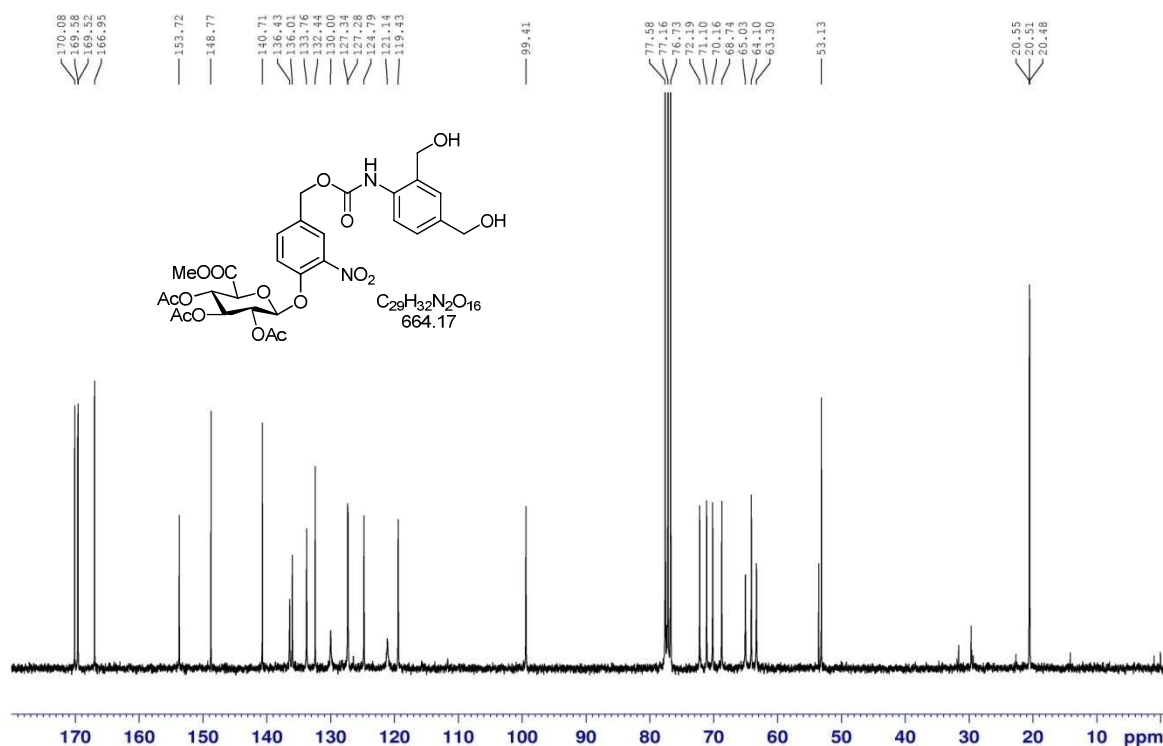

<sup>13</sup>C NMR spectrum of **6**,  
75 MHz, 298 K, CDCl<sub>3</sub>.

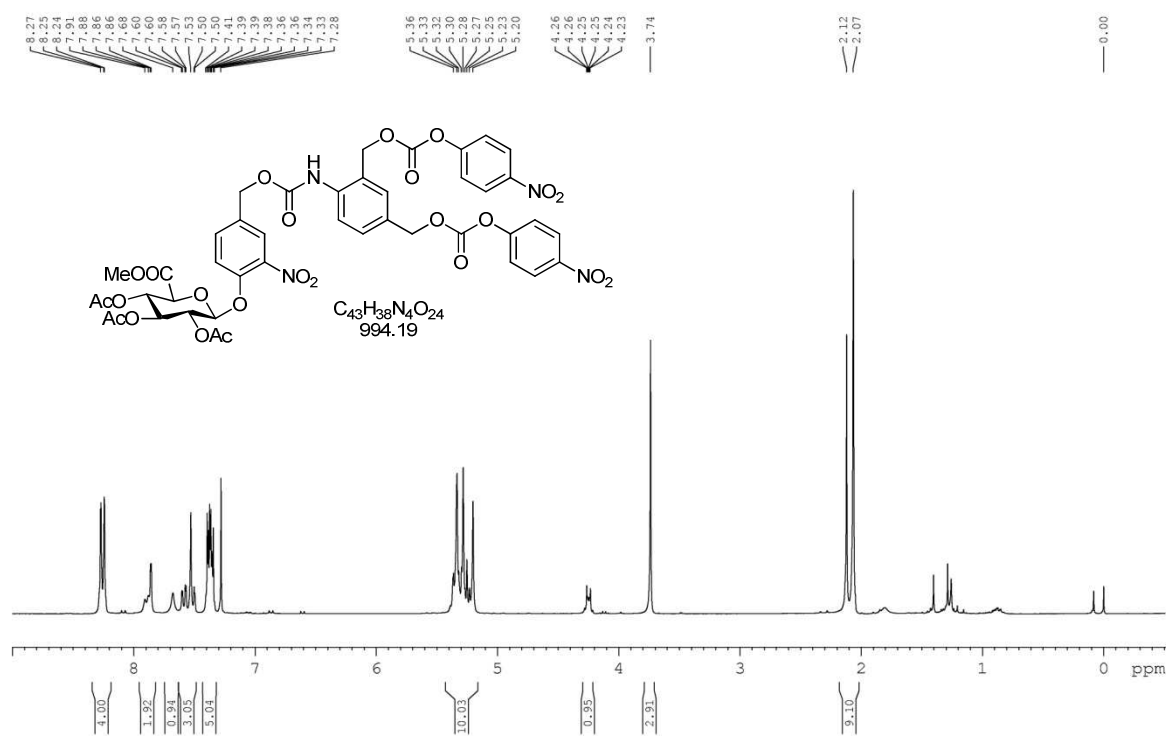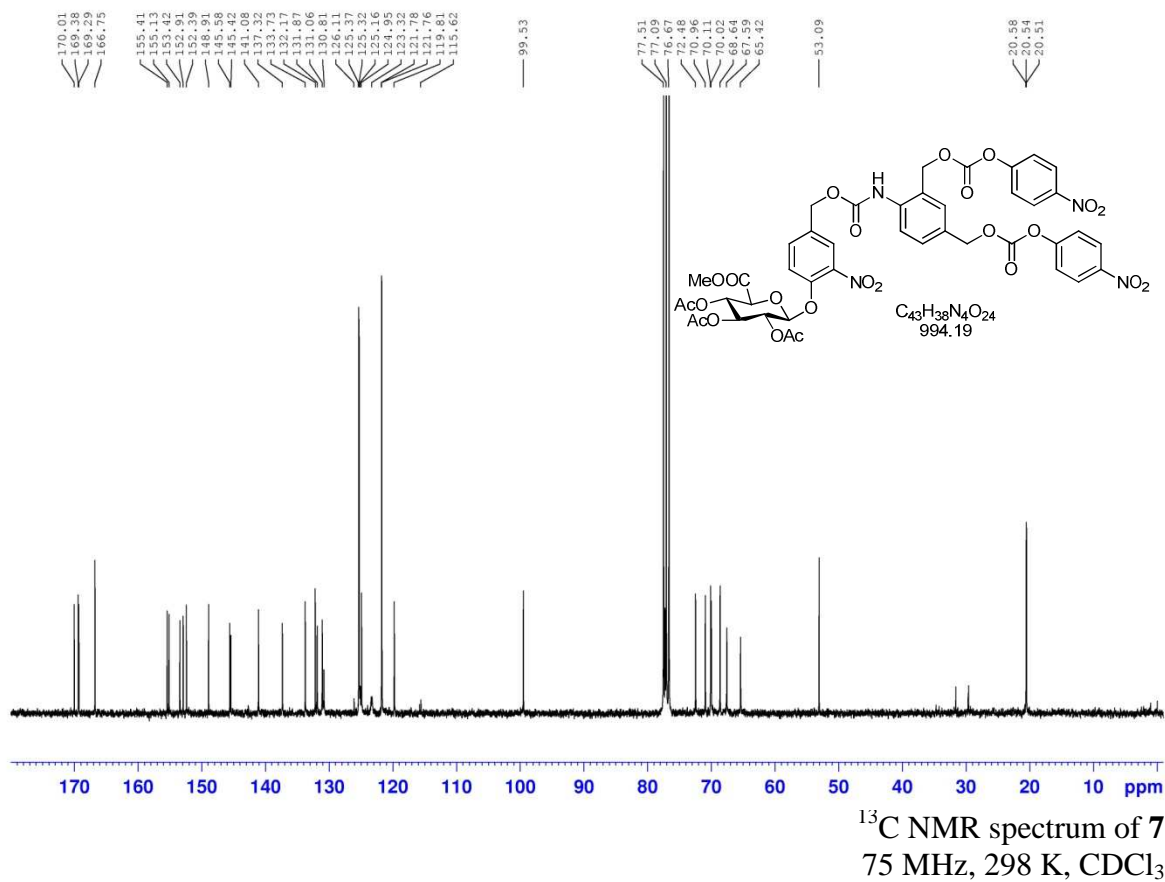

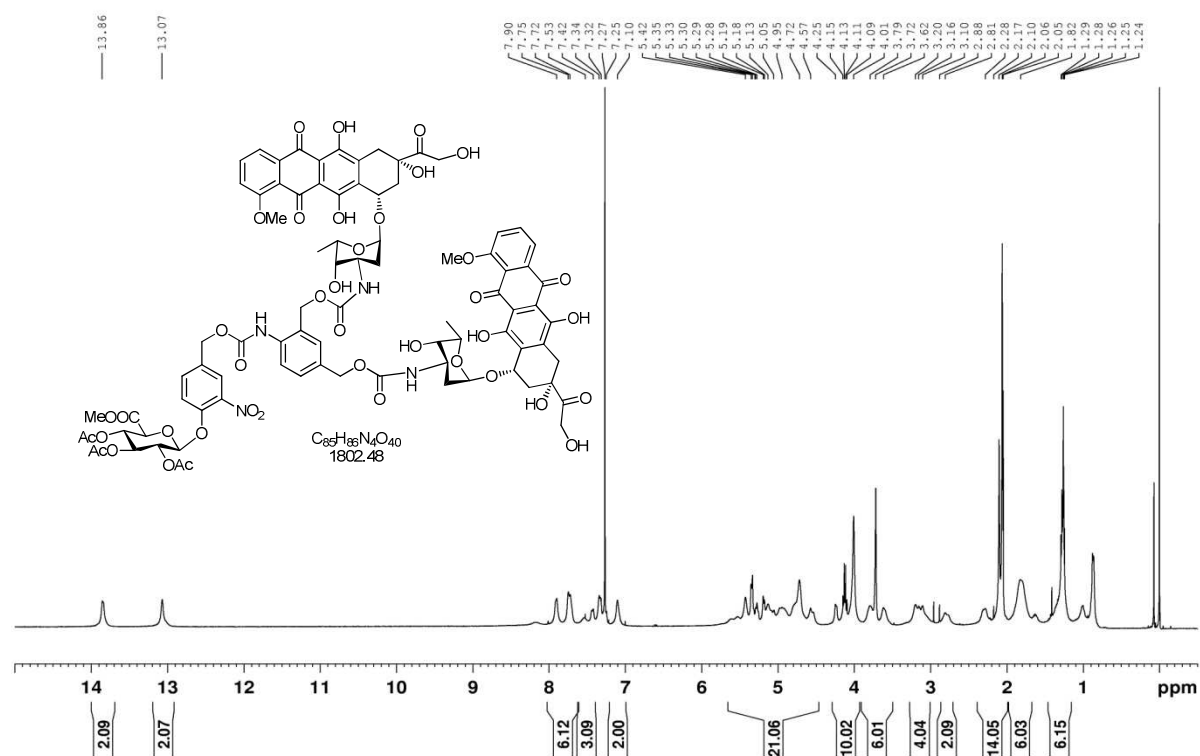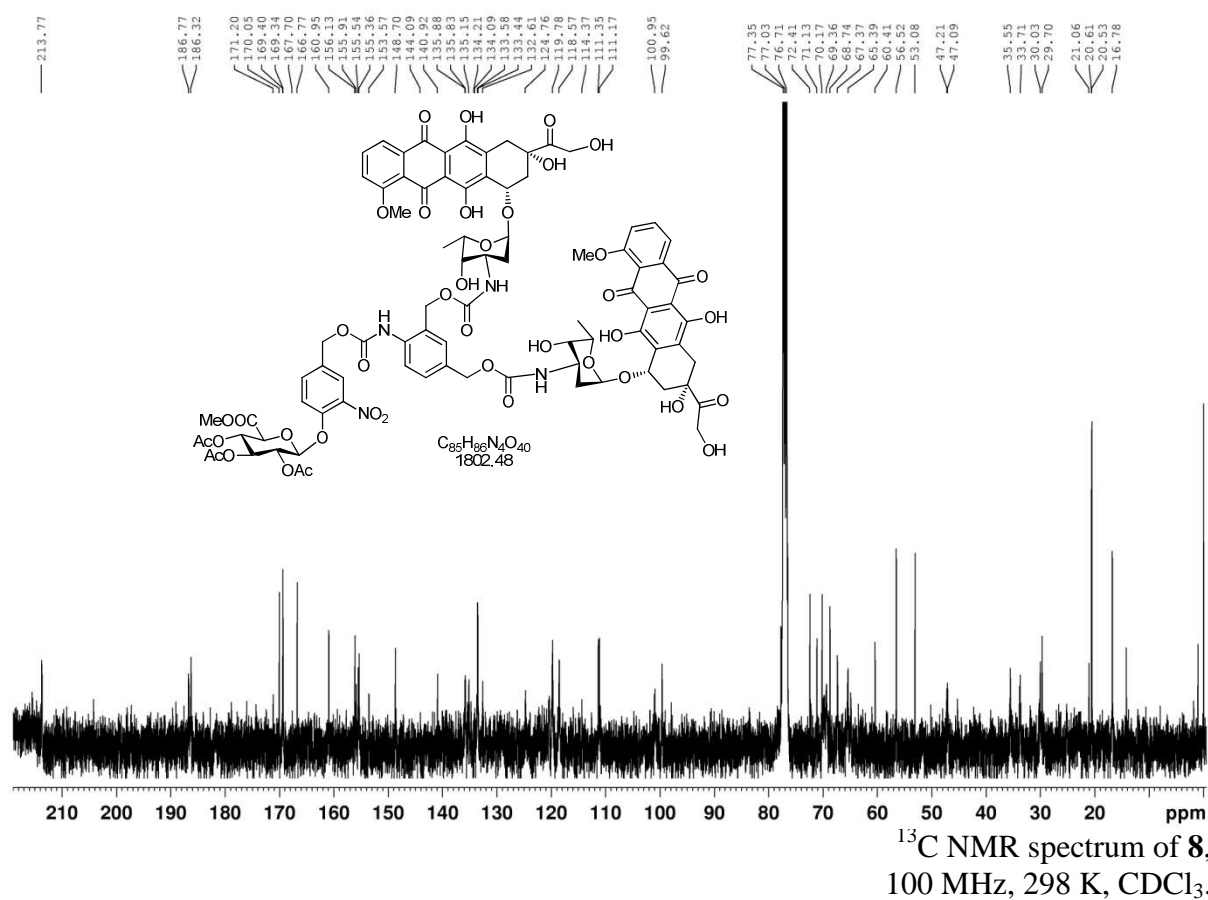

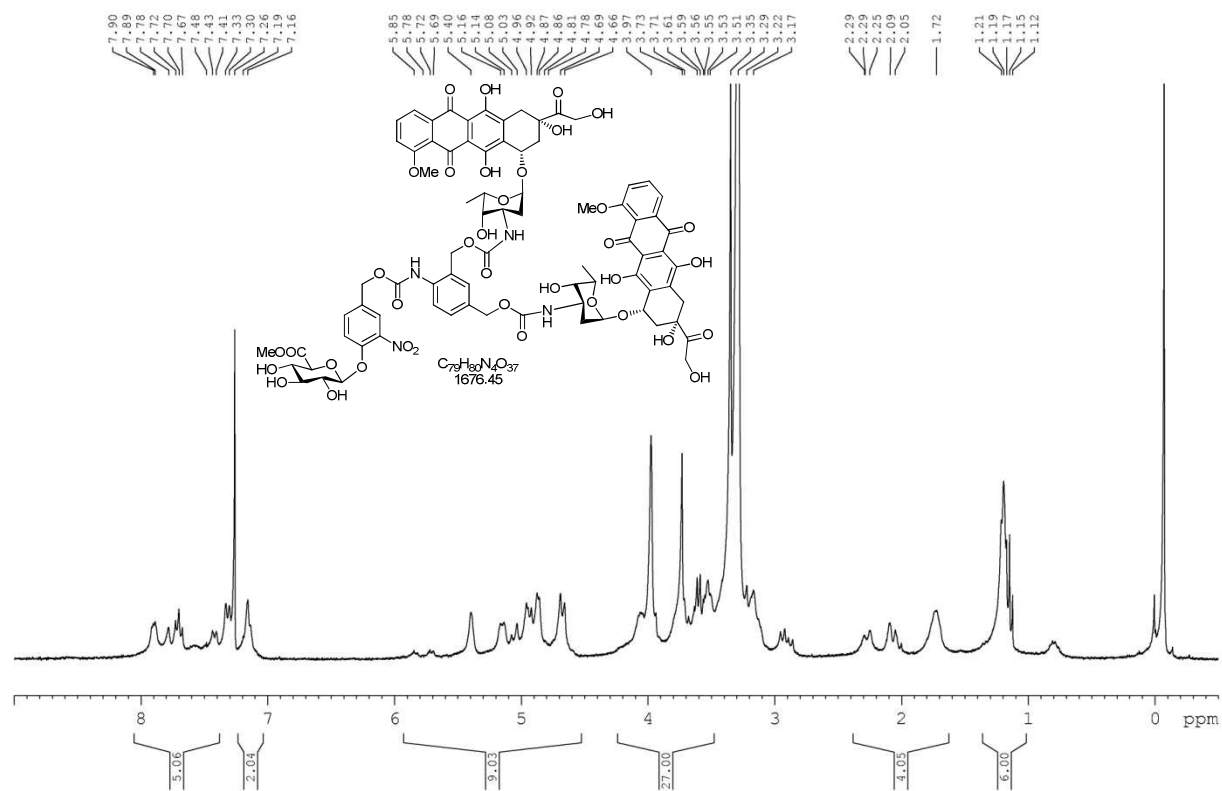

<sup>1</sup>H NMR spectrum of **9**,  
300 MHz, 298 K, CDCl<sub>3</sub>+10% MeOD-*d*<sub>4</sub>.

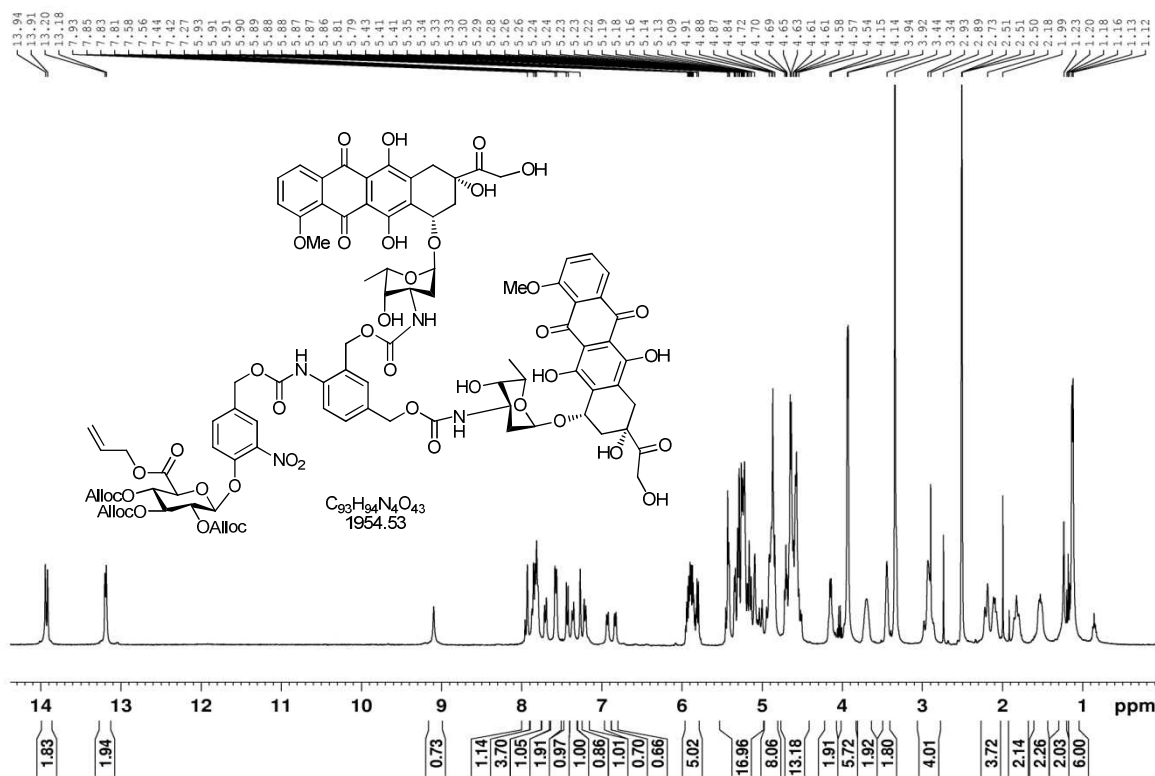

<sup>1</sup>H NMR spectrum of **11**,  
400 MHz, 298 K, DMSO-*d*<sub>6</sub>.

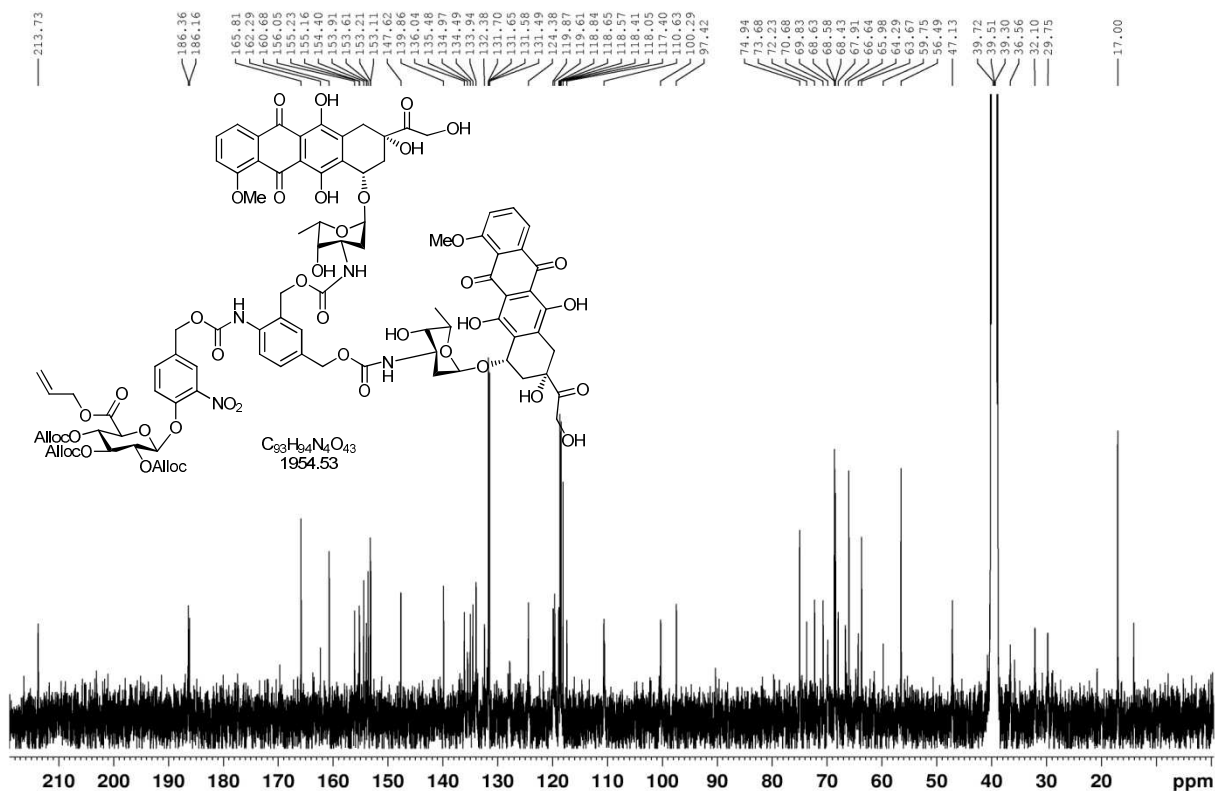

<sup>13</sup>C NMR spectrum of **11**,  
100 MHz, 298 K, DMSO-*d*<sub>6</sub>.

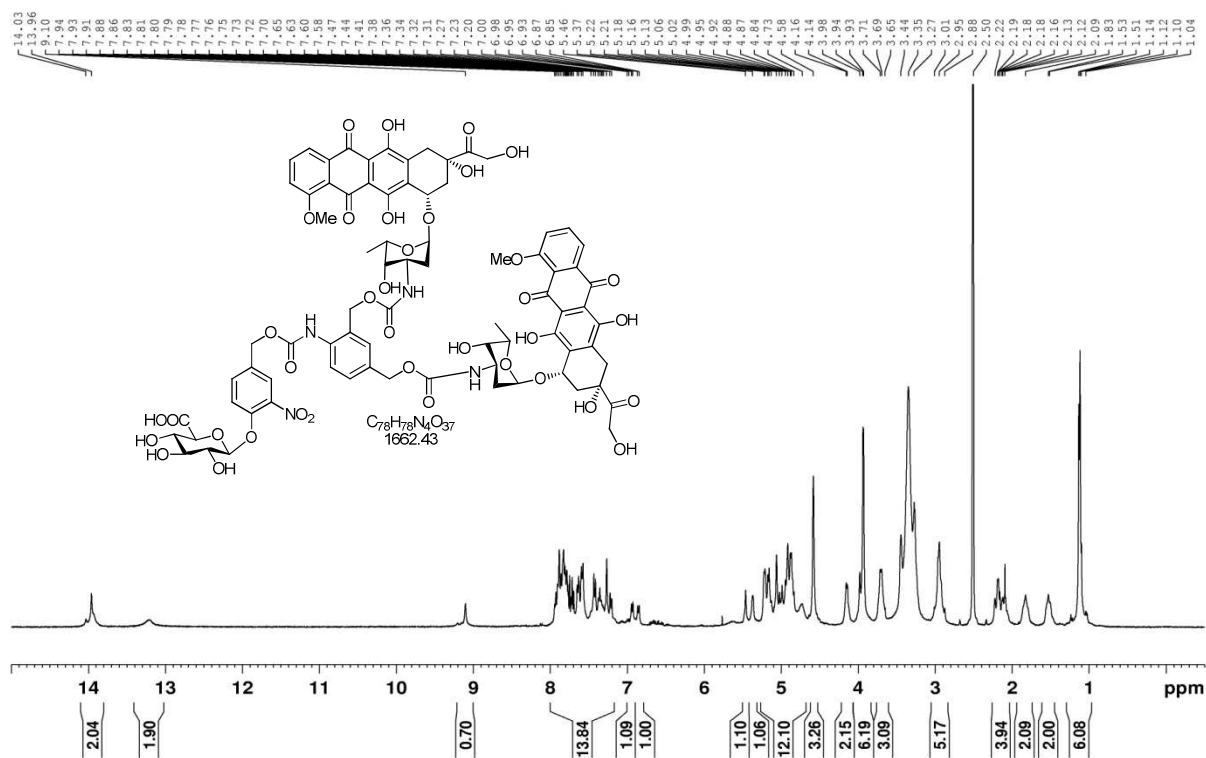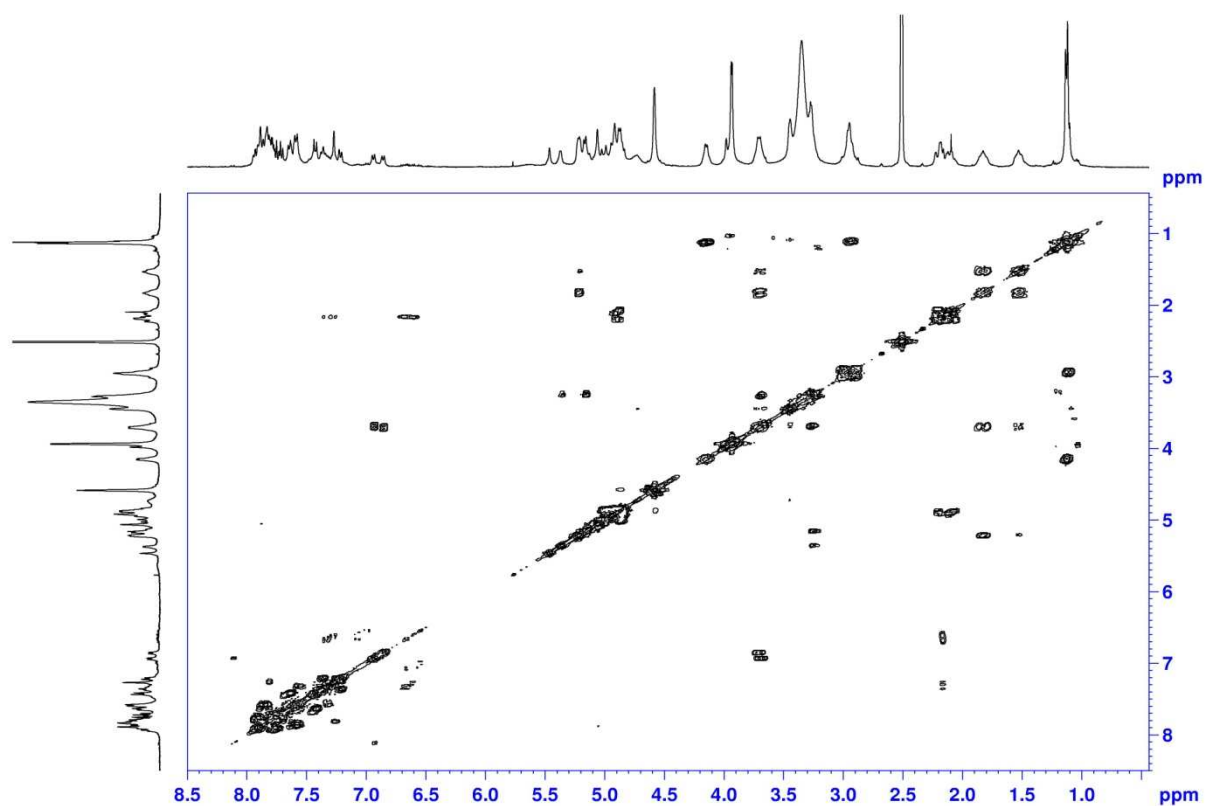



## II. Biological Section

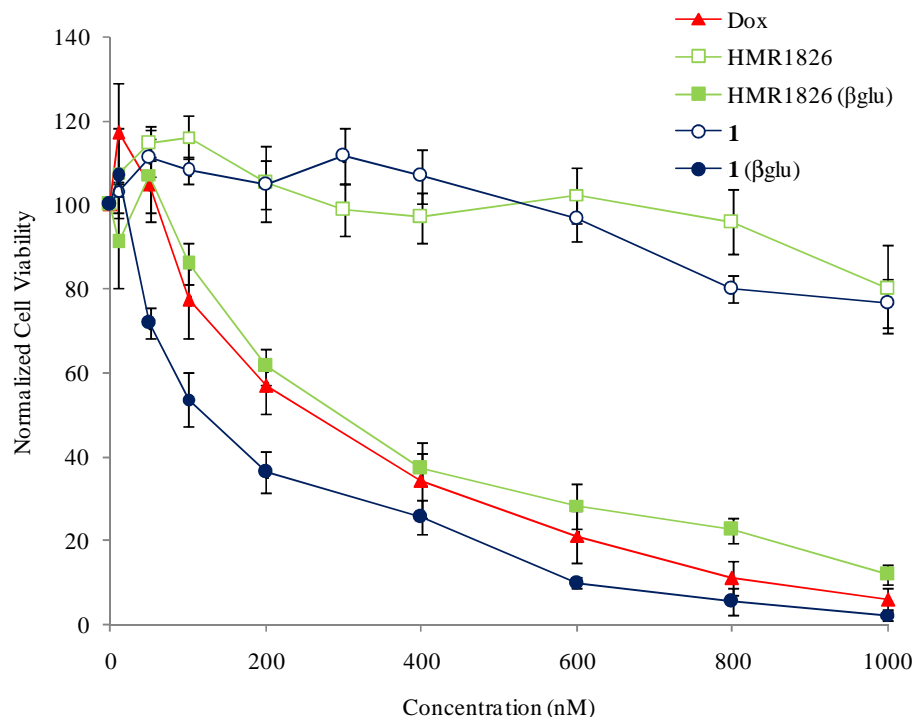

Cell viability of H661 cells treated 3 days with indicated compounds (from 10 to 1000 nM) compared to untreated cells. IC<sub>50</sub> values are 250, 280 and 110 nM for doxorubicin, HMR 1826 and prodrug **1** respectively. Graphs represent mean  $\pm$  SEM of four independent experiments performed in triplicate.

### Cell culture

H661 (non-small cells lung cancer) cells were grown in RPMI medium supplemented by 10% Fetal Bovine Serum and 1% penicillin/streptomycin in 5% CO<sub>2</sub> humidified atmosphere at 37°C. When indicated, cells were incubated with 40 U/ml  $\beta$ -glucuronidase.

### Cell viability

The Cell Proliferation Kit II (XTT, Roche) was used to assess cell viability. This assay is based on the cleavage of XTT by metabolic active cells resulting in the production of an orange formazan dye quantified by spectrometry. Assays were carried out as described by the manufacturer. Briefly,  $3 \times 10^3$  cells/well were plated in 100  $\mu$ l of media in a 96-well plate. Cells were cultured 24 h before adding the compound at the indicated concentration in the culture media. After 3 days of treatment, 50  $\mu$ l of XTT labeling mixture were added per well. Cells were further incubated for additional 3 h at 37°C before determination of absorbance at 480

nm. IC<sub>50</sub> values were graphically determined using cell viability graphs. The compounds were first dissolved in DMSO at a 5 mM concentration and then diluted with the cell culture medium at the indicated concentration.

### III. References

- [1] S. Papot, D. Combaud, K. Bosslet, M. Gerken, J. Czech and J.-P. Gesson, *Bioorg. Med. Chem. Lett.*, 2000, **10**, 1835-1837.
- [2] R. Erez, D. Shabat, *Org Biomol Chem* 2008, **6**, 2669-2672.
- [3] M. Grinda, J. Clarhaut, I. Tranoy-Opalinski, B. Renoux, A Monvoisin, L. Cronier, S. Papot, *ChemMedChem*, 2011, in press, DOI: 10.1002/cmdc.201100355
